# Supplementary material for: Tolerability and Clinical Benefit Assessment of Continuous Roginolisib Administration in Patients with Cancer including Metastatic Uveal Melanoma
Source: Research Square preprint supplement (doi:10.21203/rs.3.rs-8048398/v1), 2025-12-17
Supplement: Supplementary file 2 [file 8e39e5da1f7b001fc0a71704.docx]

**Supplementary Figure Legends**

**Supplementary Fig. 1**

**a** *PIK3CD* expression and **b** *BTK* expression in patient tumour tissue compared to normal tissue extracted from the Cancer Genome Atlas (TCGA) database (TPM=Transcript Per Million. **c** *PIK3CD* expression and **d** *BTK* expression in mouse tumour models. Data were obtained from the 4HF Biotec GmbH database, integrating models and datasets from the CCLE and Oncotest GmbH (Freiburg, Germany; part of Charles River Discovery Research Services [DRS] Germany GmbH since 2015). Preclinical models were profiled using Affymetrix Human Genome U133 Plus 2.0 GeneChip arrays, Affymetrix SNP6.0 arrays, and whole-exome sequencing. The x-axis shows log2-normalized expression values. Yellow points indicate samples with single-nucleotide variants (SNVs), while violet points indicate samples with insertions/deletions (INS/DELs). The y-axis lists tumour types, ordered by increasing median mRNA expression per tumour type, with the number of samples per tumour type indicated in parentheses. Red bars represent the median expression for each tumour type, and the blue line indicates the overall median expression across all models. (PDX=Patient Derived Xenograft; CDX=Cell line Derived Xenograft; CL=Cell Line).

**Supplementary Fig. 2**

**a-b** Burden of Therapy (BoTH) in the Intent-to-Treat population assessing weekly burden of therapy for **a** all subjects or **b** mUM patients for 80mg (upper panel) vs 10, 20 and 40mg doses (lower panel) for Treatment-emergent adverse events (TEAEs) with suspected relationship to roginolisib. Cases with missing relationship of the adverse events (AE) to roginolisib were considered treatment-related **c-e** Patient-reported Common Terminology Criteria for Adverse Events (PRO-CTCAE) for abdominal pain frequency (**c**), pain frequency (**d**), and abdominal pain interference (**e**) show few changes from baseline up to Cycle 5.

**Supplementary Fig. 3**

**a-d** Individual CD63+ basophils levels following multiple dose administration of roginolisib (IOA-244) in relationship to dose and trough concentration. CD63+ basophils levels in red, trough concentration in log scale and blue. All available solid tumour patients´ CD63+ data as percentage of total basophils are represented.

**Supplementary Fig. 4**

**a** Time on treatment with roginolisib for mCM patients (n=4) at different doses (10, 20 and 80mg), of which one patient increased the dose to 80 mg. **b** Clinical benefit of mCM patients (n=4): percentage changes from baseline of Sum of Lesion Diameters (SLD) over time (SCR=Screening). **c** Comparison of immediate prior treatment and time on roginolisib in NHL-FL patients (n=8) at 20 mg and 80 mg. **d** Example of a NHL-FL patient evaluated by PET scan at every two cycles showing an initial partial response (near complete response) followed by progression at Week 24 and 32.

**Supplementary Fig. 5**

**a** Kaplan–Meier analysis showing OS and PFS for all solid tumour patients (black), mesothelioma (brown), mUM (red and mCM) blue) (n=32). **b** Kaplan–Meier analysis showing PFS for patients with NHL-FL (n=8; black) at 20 mg (red) or 80 mg (blue). **c** Changes in spleen volume measured by radiomics-based CT scans and separated by RECIST1.1 response at Week 16 (SD vs PD). **d** The quartile coefficient of dispersion (QCOD=(Q3-Q1)/(Q3+Q1)) measured by radiomics-based CT scans in SD patients (green) and PD patients (red). **e** Volumetric changes in tumour lesions per patient (n=20) and separated by RECIST1.1 response at Week 16 (PD and SD). **f** Images and radiomic evaluation of a patient with mUM with a PR while on treatment with roginolisib. Lesion changes over time (3-D rendering, CT liver/lung) in a patient with mUM treated at the 80 mg (Panel A and B). (Colour scale of each dot represents responses of lesions with green indicating responses).

**Supplementary Fig. 6**

**a-b** Cell-free DNA (cfDNA) changes in mUM (n=18) with PD vs SD at week 16 (VAFmean=average variant allele fraction, per gene). Exon variants of 13 pre-defined genes, selected based on their relevance in mUM were evaluated. The average of the VAFs was calculated by doing the sum of VAFs for all the genes per patient and per cycle and dividing by the number of mutations. **c** Oncoplot of mutations in mUM patients found in blood (n=10) by whole exome sequencing (TMB=Tumour Mutational Burden).

**Supplementary Fig. 7**

**a-b** Heatmap of surface marker expression in the different immune cell subsets measured at baseline in the blood of mUM patients (n=22) measured at different timepoints by mass cytometry.

**Supplementary Fig. 8**

Percentage of **a** CD4+, **b** CD8+, **c** CD20+ and **d** CD14+ cells (out of all cells, stained with DNAlr) in the blood of mUM patients (n=22) measured at different timepoints by mass cytometry and separated by disease progression SD and PD at Week 16. The correlation coefficients (r) and p-values (p) (unadjusted) were calculated between frequencies and timepoints using Spearman correlation. Linear mixed effect model was used to explain the longitudinal changes of the frequencies of each cell subpopulation (see Material and Methods). **e** Immunoglobulins (IgA, IgE, IgG, IgM) levels (g/L) measured by standard laboratory procedures (nephelometry for IgA, IgG, IgM and chemiluminescence immunoassay for IgE) in the blood of mUM patients (n=29) across time.

**Supplementary Fig. 9**

**a-b** Expression levels of proteins involved in the PI3K signalling across timepoints in **a** SD and **b** PD patients (n=29). The Sidak adjusted p-values were calculated by Analysis of Variance (ANOVA) and linear mixed effects (lmer) model. **c** Basal levels of proteins related to PI3K signalling in patients with PD and SD at Week 16 (n=29). **d** Correlation betweenthe OS of patients (n=20) and the fold change of FKBP4 protein levels at Cycle 2 compared to Cycle 1. **e** Heatmap of the olfactory receptor genes that were significantly downregulated in the patients with SD at Week 16 after roginolisib treatment (17 tissue samples from 14 patients). Patient-specific correlations were estimated and incorporated into the model. Contrasts were then defined to compare conditions across treatment stages.
