# Supplementary material for: Tolerability and Clinical Benefit Assessment of Continuous Roginolisib Administration in Patients with Cancer including Metastatic Uveal Melanoma
Source: Research Square preprint supplement (doi:10.21203/rs.3.rs-8048398/v1), 2025-12-17
Supplement: Supplementary file 3 [file d283b887b95e19798b97aad1.docx]

**Supplemental Tables**

**Table S1 Summary of Treatment Interruptions in All Treated Patients (n=44)**

| **Reason** | **events** | **n** | **%** | **Days** | | |
| --- | --- | --- | --- | --- | --- | --- |
|  |  |  |  | Mean | Median | Range |
| SARS-Cov2  (COVID-19 infection) | 9 | 8 | 18 | 14 | 11 | 4-43 |
| SARS-Cov2  (COVID-19 Vaccine) | 13 | 8 | 18 | 4 | 4 | 2-5 |
| SARS-Cov2  (COVID-19 Infection/Vaccine) | 22 | 13 | 30 | 8 | 5 | 2-43 |
| Radiotherapy | 4 | 3 | 7 | 11 | 14 | 1-17 |
| Surgery | 5 | 3 | 7 | 5 | 5 | 3-6 |
| Fever/Infection  (not SARS-Cov2, COVID-19) | 7 | 4 | 9 | 9 | 7 | 2-19 |
| Other AE  (not covered above) | 25 | 16 | 36 | 13 | 7 | 1-43 |
| Other (IMP) | 2 | 2 | 5 | 3 | 3 | 1-5 |
| Other | 8 | 7 | 18 | 7 | 7 | 2-11 |
| All | 67 | 24 | 55 | 9 | 6 | 1-43 |

AE stands for adverse event, IMP stands for investigational medicinal product.

Data cut-off: Dec 20, 2023; 3 patients had TEAEs related to roginolisib; 1 patient had vomiting leading to 2 days interruption, 1 patient had an amylase and lipase increase, leading to interruption of 38 days, and 1 patient had uveitis, with drug interrupted for 7 days followed by sponsor decision to discontinue the patient permanently as a precaution.

**Table S2 Additional Important Baseline Characteristics of Patients with Metastatic Uveal Melanoma (mUM)**

| **mUM Patient Baseline data (n=29)** | **n (%)** |
| --- | --- |
| ECOG performance status |  |
| 0 | 24 (83) |
| 1 | 5 (17) |
|  |  |
| Elevated baseline LDH >ULN | 17 (59) |
| Less than 2× ULN | 13 (45) |
| ≥2× ULN | 4 (14) |
|  |  |
| Elevated baseline ALP >ULN | 12 (41) |
| Less than 2× ULN | 5 (17) |
| ≥2× ULN | 7 (24) |
|  |  |
| Largest liver lesiona |  |
| pM1a (≤3 cm) | 5 (17) |
| pM1b (>3 cm – ≤8 cm) | 16 (55) |
| pM1c (>8 cm) | 8 (28) |

ALP stands for alkaline phosphatase, ECOG stands for Eastern Cooperative Oncology Group, LDH stands for lactate dehydrogenase, ULN stands for upper limit of normal.

aMeasurable lesion by investigator was not confirmed by independent central review (AJCC Cancer Staging 8th edition)

**Table S3 Summary of Treatment-emergent Adverse Events Related to Roginolisib in at least One Participant (n=44 patients)**

| **System Organ Class and Preferred Term** | **Overall**  **n (%)** | **Grade 1**  **n (%)** | **Grade 2**  **n (%)** | **Grade 3**  **n (%)** | **Grade 4 n (%)** |
| --- | --- | --- | --- | --- | --- |
| Any related TEAEs | 21 (47.7) | 17 (38.6) | 6 (13.6) | 3 (6.8) | 0 |
| Investigations | 6 (13.6) | 4 (9.1) | 2 (4.5) | 3 (6.8) | 0 |
| ALT increased | 3 (6.8) | 2 (4.5) | 1 (2.3) | 0 | 0 |
| AST increased | 3 (6.8) | 3 (6.8) | 0 | 0 | 0 |
| Blood alkaline phosphatase increased | 2 (4.5) | 2 (4.5) | 0 | 0 | 0 |
| Blood bilirubin increased | 1 (2.3) | 1 (2.3) | 0 | 0 | 0 |
| Blood uric acid increased | 1 (2.3) | 1 (2.3) | 0 | 0 | 0 |
| Amylase increased | 1 (2.3) | 0 | 1 (2.3) | 0 | 0 |
| Lipase increased | 1 (2.3) | 0 | 0 | 1 (2.3) | 0 |
| Neutrophil count decreased | 1 (2.3) | 0 | 0 | 1 (2.3) | 0 |
| Platelet count decreased | 1 (2.3) | 0 | 0 | 1 (2.3) | 0 |
| Gastrointestinal disorders | 6 (13.6) | 5 (11.4) | 2 (4.5) |  |  |
| Diarrhoea | 4 (9.1) | 3 (6.8) | 1 (2.3) | 0 | 0 |
| Vomiting | 2 (4.5) | 2 (4.5) | 0 | 0 | 0 |
| Nausea | 1 (2.3) | 0 | 1 (2.3) | 0 | 0 |
| Nervous system disorders | 3 (6.8) | 3 (6.8) | 0 | 0 | 0 |
| Dysgeusia | 1 (2.3) | 1 (2.3) | 0 | 0 | 0 |
| Headache | 1 (2.3) | 1 (2.3) | 0 | 0 | 0 |
| Lethargy | 1 (2.3) | 1 (2.3) | 0 | 0 | 0 |
| Paraesthesia | 1 (2.3) | 1 (2.3) | 0 | 0 | 0 |
| Skin and subcutaneous tissue disorders | 2 (4.5) | 2 (4.5) | 0 | 0 | 0 |
| Dry skin | 1 (2.3) | 1 (2.3) | 0 | 0 | 0 |
| Pruritus | 1 (2.3) | 1 (2.3) | 0 | 0 | 0 |
| Metabolism and nutrition disorders | 2 (4.5) | 2 (4.5) | 0 | 0 | 0 |
| Decreased appetite | 1 (2.3) | 1 (2.3) | 0 | 0 | 0 |
| Hypophosphataemia | 1 (2.3) | 1 (2.3) | 0 | 0 | 0 |
| Renal and urinary disorders | 2 (4.5) | 2 (4.5) | 0 | 0 | 0 |
| Proteinuria | 2 (4.5) | 2 (4.5) | 0 | 0 | 0 |
| General disorders and administration site  conditions | 1 (2.3) | 1 (2.3) | 0 | 0 | 0 |
| Asthenia | 1 (2.3) | 1 (2.3) | 0 | 0 | 0 |
| Musculoskeletal and connective tissue  disorders | 1 (2.3) | 1 (2.3) | 0 | 0 | 0 |
| Arthralgia | 1 (2.3) | 1 (2.3) | 0 | 0 | 0 |
| Blood and lymphatic system disorders | 1 (2.3) | 0 | 1 (2.3) | 0 | 0 |
| Anaemia | 1 (2.3) | 0 | 1 (2.3) | 0 | 0 |
| Eye disorders | 1 (2.3) | 0 | 1 (2.3) | 0 | 0 |
| Uveitis | 1 (2.3) | 0 | 1 (2.3) | 0 | 0 |
| Infections and infestations | 1 (2.3) | 0 | 1 (2.3) | 0 | 0 |
| Herpes Zoster | 1 (2.3) | 0 | 1 (2.3) | 0 | 0 |

ALT stands for alanine aminotransferase, AST stands for aspartate aminotransferase, N stands for total number of participants, n stands for number of participants, TEAE stands for treatment-emergent adverse event.

Participants with multiple events were counted only once per preferred term.

**Table S4 Summary of Treatment-emergent Adverse Events (TEAE) in more than Three Participants Irrespective of Relationship to Drug (n=44 patients)**

| **System Organ Class and Preferred Term** | **CTCAE Grade Toxicity** | | | | |
| --- | --- | --- | --- | --- | --- |
|  | **Overall**  **n (%)** | **Grade 1**  **n (%)** | **Grade 2**  **n (%)** | **Grade 3**  **n (%)** | **Grade 4**  **n (%)** |
| Any TEAEs | 42 (95.5) a | 11 (25.0) | 17 (38.6) | 9 (20.5) | 1 (2.3) |
| Investigations | 20 (45.5) | 10 (22.7) | 4 (9.1) | 6 (13.6) | 0 |
| AST increased | 8 (18.2) | 5 (11.4) | 0 | 3 (6.8) | 0 |
| ALT increased | 8 (18.2) | 5 (11.4) | 1 (2.3) | 2 (4.5) | 0 |
| Blood bilirubin increased | 4 (9.1) | 1 (2.3) | 3 (6.8) | 0 | 0 |
| Blood alkaline phosphatase | 5 (11.4) | 5 (11.4) | 0 | 0 | 0 |
| Blood creatinine increased | 3 (6.8) | 2 (4.5) | 1 (2.3) | 0 | 0 |
| SARS-CoV-2 (Coronavirus test) positive | 3 (6.8) | 3 (6.8) | 0 | 0 | 0 |
| Gastrointestinal disorders | 27 (61.4) | 16 (36.4) | 10 (22.7) | 1 (2.3) | 0 |
| Diarrhoea | 12 (27.3) | 7 (15.9) | 4 (9.1) | 1 (2.3) | 0 |
| Abdominal pain | 10 (22.7) | 4 (9.1) | 5 (11.4) | 1 (2.3) | 0 |
| Nausea | 4 (9.1) | 2 (4.5) | 2 (4.5) | 0 | 0 |
| Vomiting | 8 (18.2) | 8 (18.2) | 0 | 0 | 0 |
| Abdominal discomfort | 3 (6.8) | 3 (6.8) | 0 | 0 | 0 |
| Abdominal pain upper | 4 (9.1) | 4 (9.1) | 0 | 0 | 0 |
| General disorders and administration site conditions | 21 (47.7) | 13 (29.5) | 6 (13.6) | 1 (2.3) | 0 |
| Pyrexia | 12 (27.3) | 8 (18.2) | 4 (9.1) | 0 | 0 |
| Non-cardiac chest pain | 5 (11.4) | 3 (6.8) | 2 (4.5) | 0 | 0 |
| Fatigue | 4 (9.1) | 4 (9.1) | 0 | 0 | 0 |
| Infections and infestations | 13 (29.5) | 6 (13.6) | 7 (15.9) | 0 | 0 |
| Corona virus infection | 7 (15.9) | 7 (15.9) | 0 | 0 | 0 |
| Musculoskeletal and connective tissue disorders | 13 (29.5) | 10 (22.7) | 3 (6.8) | 0 | 0 |
| Back pain | 8 (18.2) | 5 (11.4) | 3 (6.8) | 0 | 0 |
| Arthralgia | 3 (6.8) | 3 (6.8) | 0 | 0 | 0 |
| Blood and lymphatic system disorders | 11 (25.0) | 5 (11.4) | 5 (11.4) | 1 (2.3) | 0 |
| Anaemia | 8 (18.2) | 2 (4.5) | 5 (11.4) | 1 (2.3) | 0 |
| Skin and subcutaneous tissue disorders | 8 (18.2) | 6 (13.6) | 1 (2.3) | 0 | 0 |
| Respiratory, thoracic and  mediastinal disorders | 10 (22.7) | 8 (18.2) | 0 | 0 | 0 |
| Cough | 4 (9.1) | 4 (9.1) | 0 | 0 | 0 |
| Dyspnoea | 3 (6.8) | 2 (4.5) | 0 | 0 | 0 |
| Nervous system disorders | 11 (25.0) | 8 (18.2) | 3 (6.8) | 0 | 0 |
| Headache | 3 (6.8) | 3 (6.8) | 0 | 0 | 0 |
| Metabolism and nutrition disorders | 7 (15.9) | 5 (11.4) | 2 (4.5) | 0 | 0 |
| Decreased appetite | 3 (6.8) | 2 (4.5) | 1 (2.3) | 0 | 0 |
| Renal and urinary disorders | 3 (6.8) | 2 (4.5) | 1 (2.3) | 0 | 0 |
| Eye disorders | 5 (11.4) | 4 (9.1) | 1 (2.3) | 0 | 0 |
| Endocrine disorders | 3 (6.8) | 1 (2.3) | 1 (2.3) | 1 (2.3) | 0 |
| Psychiatric disorders | 4 (9.1) | 4 (9.1) | 0 | 0 | 0 |

ALT stands for alanine aminotransferase, AST= stands for aspartate aminotransferase, N stands for total number of participants, n stands for number of participants, TEAE stands for treatment-emergent adverse event

a3 patients had a Grade 5 (fatal) event (one patient with uveal melanoma had disease progression; one patient with mesothelioma had dyspnoea, also considered to be disease progression; one patient with cutaneous melanoma had a pulmonary embolism). One patient with night sweats had a missing value.

Participants with multiple events were counted only once per preferred term.

**Table S5 Summary of Treatment-emergent Adverse Events (TEAE) Related to Roginolisib in more than One Participant by Indication**

| **SOC**  **Preferred term** | **Uveal melanoma** | **Cutaneous melanoma** | **Mesothelioma** | **NHL-FL** | **Overall** |
| --- | --- | --- | --- | --- | --- |
|  | **(N=29)** | **(N=5)** | **(N=2)** | **(N=8)** | **(N=44)** |
|  | **n (%)** | **n (%)** | **n (%)** | **n (%)** | **n (%)** |
| Any related TEAEs | 15 (51.7) | 0 | 2 (100) | 4 (50.0) | 21 (47.7) |
| Investigations | 3 (10.3) | 0 | 0 | 3 (37.5) | 6 (13.6) |
| ALT increased | 2 (6.9) | 0 | 0 | 1 (12.5) | 3 (6.8) |
| AST increased | 2 (6.9) | 0 | 0 | 1 (12.5) | 3 (6.8) |
| Blood alkaline phosphatase increased | 2 (6.9) | 0 | 0 | 0 | 2 (4.5) |
| Gastrointestinal disorders | 5 (17.2) | 0 | 0 | 1 (12.5) | 6 (13.6) |
| Diarrhoea | 3 (10.3) | 0 | 0 | 1 (12.5) | 4 (9.1) |
| Vomiting | 2 (6.9) | 0 | 0 | 0 | 2 (4.5) |
| Nervous system disorders | 3 (10.3) | 0 | 0 | 0 | 3 (6.8) |
| Skin and subcutaneous tissue disorders | 2 (6.9) | 0 | 0 | 0 | 2 (4.5) |
| Metabolism and nutrition disorders | 1 (3.4) | 0 | 1 (50.0) | 0 | 2 (4.5) |
| Renal and urinary disorders | 2 (6.9) | 0 | 0 | 0 | 2 (4.5) |
| Proteinuria | 2 (6.9) | 0 | 0 | 0 | 2 (4.5) |

ALT stands for alanine aminotransferase, AST stands for aspartate aminotransferase, E stands for number of events, N stands for total number of participants, n stands for number of participants, NHL-FL stands for non-Hodgkin lymphoma, subtype follicular lymphoma, PT stands for preferred term, SOC stands for system organ class, TEAE stands for treatment-emergent adverse event.

The denominator for percentages is the number of participants in the safety population for each group.

Participants with multiple events were counted only once per preferred term.

**Table S6 Summary of Treatment-emergent Adverse Events (TEAE) related to Roginolisib by Severity in More than One Patient by Indication (Safety Population)**

| **SOC**  **Preferred Term** | **Uveal melanoma** | **Cutaneous melanoma** | **Mesothelioma** | **NHL-FL** | **Overall** |
| --- | --- | --- | --- | --- | --- |
|  | **(N=29)** | **(N=5)** | **(N=2)** | **(N=8)** | **(N=44)** |
|  | **n (%)** | **n (%)** | **n (%)** | **n (%)** | **n (%)** |
| **Grade 1: mild** | | | | | |
| Any TEAEs | 12 (41.4) | 0 | 2 (100) | 3 (37.5) | 17 (38.6) |
| Gastrointestinal disorders | 4 (13.8) | 0 | 0 | 1 (12.5) | 5 (11.4) |
| Diarrhoea | 2 (6.9) | 0 | 0 | 1 (12.5) | 3 (6.8) |
| Vomiting | 2 (6.9) | 0 | 0 | 0 | 2 (4.5) |
| Investigations | 2 (6.9) | 0 | 0 | 2 (25.0) | 4 (9.1) |
| AST increased | 2 (6.9) | 0 | 0 | 1 (12.5) | 3 (6.8) |
| ALT increased | 2 (6.9) | 0 | 0 | 0 | 2 (4.5) |
| Blood alkaline phosphatase increased | 2 (6.9) | 0 | 0 | 0 | 2 (4.5) |
| Nervous system disorders | 3 (10.3) | 0 | 0 | 0 | 3 (6.8) |
| Metabolism and nutrition disorders | 1 (3.4) | 0 | 1 (50.0) | 0 | 2 (4.5) |
| Renal and urinary disorders | 2 (6.9) | 0 | 0 | 0 | 2 (4.5) |
| Proteinuria | 2 (6.9) | 0 | 0 | 0 | 2 (4.5) |
| Skin and subcutaneous tissue disorders | 2 (6.9) | 0 | 0 | 0 | 2 (4.5) |
| **Grade 2: moderate** | | | | | |
| Any TEAEs | 5 (17.2) | 0 | 0 | 1 (12.5) | 6 (13.6) |
| Gastrointestinal disorders | 2 (6.9) | 0 | 0 | 0 | 2 (4.5) |
| Investigations | 1 (3.4) | 0 | 0 | 1 (12.5) | 2 (4.5) |
| **Grade 3: severe** | | | | | |
| Any TEAEs | 1 (3.4) | 0 | 0 | 2 (25.0) | 3 (6.8) |
| Investigations | 1 (3.4) | 0 | 0 | 2 (25.0) | 3 (6.8) |

ALT stands for alanine aminotransferase;, AST stands for aspartate aminotransferase, CTCAE stands for Common Terminology Criteria for Adverse Events, N stands for total number of participants, n stands for number of participants, NHL-FL stands for non-Hodgkin lymphoma, subtype follicular lymphoma, SOC stands for system organ class, TEAE stands for treatment-emergent adverse event.

The denominator for percentages is the number of participants in the safety population for each group.

Participants with multiple events for the same preferred term were counted at the maximum CTCAE grade per PT.

**Table S7 Summary of Clinical Anti-tumour Evaluations in the Patients Meeting Criteria for Efficacy Evaluation**

| **Endpoint**a | **Cancer Type and Number of Patients** | | | | | |
| --- | --- | --- | --- | --- | --- | --- |
| **mUM** | **mCM** | **Meso** | **All ST** | **NHL-FL** |
| N | 27 | 4 | 1 | 32 | 8 |
| TTF mo  (95% CI) | 14.1  (4.9, NE) | 11.8  (2.8, NE) | 2.6  (NE, NE) | 14.1  (4.6, NE) | NE |
| mPFS mo  (95% CI) | 5.3  (3.7, 5.9) | 2.8  (1.9, NE) | 1.9  (NE, NE) | 3.8  (3.6, 5.8) | 1.7  (1.5, 3.6) |
| mOS mo  (95% CI) | 20.8  (10.7, 29.5) | 20.1  (3.8, NE) | 8.7  (NE, NE) | N/A | NE  (4.6, NE) |
| Stable Disease (SD) at Week 16 mo  (95% CI) | 28.5  (14.1, NE) | ND | ND | ND | ND |
| Progressive Disease (PD) at Week 16 mo  (95% CI) | 12.3  (6.9, NE) | ND | ND | ND | ND |

mUM stands for metastatic Uveal Melanoma, mCM stands for metastatic Cutaneous Melanoma, Meso stands for Mesothelioma, ST stands for solid tumour, NHL-FL stands for Non-Hodgkin Lymphoma – Follicular Lymphoma, mo stands for months,

aData cut-off date of 20-Dec-2023; ND – Not Done, NE-Not-Evaluable.

**Table S8 Relationship of Stable Disease (SD) and Progressive Disease (PD) at Week 16 (=3.8 months) and Clinical Outcomes, including Overall Survival (OS), in metastatic Uveal Melanoma (mUM) Patients**

| **Parameter** | **Roginolisib**  **(Cut-off May 2024, not source verified)** | | |
| --- | --- | --- | --- |
| **All pts with mUM** | **mUM pts with SD at Week 16** | **mUM pts with PD at Week 16** |
| n | 29 | 13/29 (45%) | 16/29 (55%) |
| Treated Beyond Progression (TBP) | 15/29  (52%) | 7/13  (54%) | 8/16  (50%) |
| Median Time on Treatment, mo (range) | 5.1 mo | 14 mo | 4.6 mo |
| ≥24 weeks  (~ 5.5 mo) CR/PR/SD | 8/29  (28%) | NA | NA |
| PFS median, mo | 5.3  (95% CI 3.7-5.9) | NA | NA |
| OS rate at 12 mo | 62% | 85% | 38% |
| Median OS at Data Cut-off Dec 2024 | 15.9 mo | 20.1 mo | 10.9 mo |

pts stands for patients, CR stands for complete response, PR stands for partial response, SD stands for Stable Disease, PFS stands for Progression-free survival, OS stands for Overall Survival, Dec stands for December, mo stands for months, NA stands for Not available

**Table S9 Top 20 Increased Proteins in Plasma of Uveal Melanoma (UM) Patients with Progressive Disease (PD) at Week 16 (based on Olink Assay)**

| **Protein** | **Abbreviation** | **Estimate** | **Sidak Adj p-value** |
| --- | --- | --- | --- |
| GrpE Like 1 | GRPEL1 | 1.310335 | 6.20E-04 |
| AKT1 Substrate 1 | AKT1S1 | 1.232811 | 2.75E-04 |
| DnaJ Heat Shock Protein Family Member C9 | DNAJC9 | 1.127346 | 5.86E-04 |
| Adhesion G Protein-Coupled Receptor G1 | ADGRG1 | 1.120879 | 5.22E-04 |
| Hydroxysteroid 17-Beta Dehydrogenase 14 | HSD17B14 | 1.098567 | 5.12E-06 |
| Methionyl Aminopeptidase Type 1D | METAP1D | 1.096859 | 1.51E-03 |
| Angiotensin Converting Enzyme 2 | ACE2 | 1.091203 | 4.96E-04 |
| Catechol-O-Methyltransferase | COMT | 1.088926 | 1.10E-04 |
| Enoyl-CoA Hydratase Domain Containing 3 | ECHDC3 | 1.053795 | 8.45E-04 |
| Glyoxalase 1 | GLO1 | 1.037136 | 1.80E-04 |
| Phosphoprotein Membrane Anchor With Glycosphingolipid Microdomains 1 | PAG1 | 1.02766 | 1.72E-06 |
| DnaJ Heat Shock Protein Family Member A4 | DNAJA4 | 1.001195 | 3.53E-04 |
| Lon Peptidase 1 | LONP1 | 1.000958 | 4.03E-03 |
| Eukaryotic Translation Elongation Factor 1 Delta | EEF1D | 1.000831 | 1.61E-04 |
| Slit Guidance Ligand 2 | SLIT2 | 0.994383 | 1.97E-04 |
| Zinc Ribbon Domain Containing 2 | ZNRD2 | 0.989805 | 1.69E-04 |
| FKBP Prolyl Isomerase 4 | FKBP4 | 0.959886 | 2.47E-08 |
| Dpy-30 Histone Methyltransferase Complex Regulatory Subunit | DPY30 | 0.957557 | 1.63E-04 |
| EF-Hand Domain Family Member D1 | EFHD1 | 0.953472 | 3.46E-06 |
| C-X-C Motif Chemokine Ligand 8 | CXCL8 | 0.951149 | 3.38E-04 |

**Table S10 Mutations found by Whole-exome Sequencing (WES) in Tumour Tissue and Circulating Free DNA (cfDNA)**

| **Gene** | **Mutation Type** | **Amino Acid change** | **DNA change** |
| --- | --- | --- | --- |
| **Tumour Tissue DNA** | | | |
| ARID1A | Deleted |  |  |
| ATM | Deleted |  |  |
| Missense | p.R982H | c.2945G>A |
| BAP1 | Duplication | p.Y671fs | c.2012dupA |
| Nonsense | p.R385* | c.1153C>T |
| Frameshift deletion | p.L570fs | c.1708delC |
| Splice site |  | c.226_255+2del32 |
| Nonsense | p.K155* | c.463A>T |
| Nonsense | p.Q260* | c.778C>T |
| CHEK1 | Deleted |  |  |
| CYLD | Deleted |  |  |
| FANCA | Deleted |  |  |
| FANCD2 | Deleted |  |  |
| Duplication | p.Q527fs | c.1577dupC |
| FAT1 | Deleted |  |  |
| FBXW7 | Deleted |  |  |
| Missense | p.S582L | c.1745C>T |
| Nonsense | p.R222* | c.664C>T |
| GNA11 | Missense | p.Q209L | c.626A>T |
| Missense | p.R183C | c.547C>T |
| GNAQ | Missense | p.Q209L | c.626A>T |
|  | Missense | p.Q209P | c.626A>C |
| IDH1 | Missense | p.R132H | c.395G>A |
| NBN | Deleted |  |  |
| SF3B1 | Missense | p.R625H | c.1874G>A |
| Missense | p.R625C | c.1873C>T |
| **Circulating cfDNA** | | | |
| ACVR1 | Missense | p.R206H | c.617G>A |
| ASXL1 | Frameshift deletion | p.P808fs | c.2423delC |
| AXIN2 | Duplication | p.N666fs | c.1994dupG |
| BAP1 | Nonsense | p.Q260* | c.778C>T |
| Duplication | p.Y671fs | c.2012dupA |
| CDKN2A | Nonsense | p.R58* | c.172C>T |
| CREBBP | Missense | p.R1446H | c.4337G>A |
| DICER1 | Nonsense | p.Q1028* | c.3082C>T |
| DNMT3A | Nonsense | p.W330* | c.989G>A |
|  | Missense | p.S714C | c.2141C>G |
| EZH2 | Missense | p.Y646H | c.1936T>C |

| FBXW7 | Missense | p.R465H | c.1394G>A |
| --- | --- | --- | --- |
| Nonsense | p.Q548* | c.1642C>T |
| GNA11 | Missense | p.Q209L | c.626A>T |
| GNAQ | Missense | p.Q209L | c.626A>C |
| deletion/insertion | G48L | c.142_143delinsTT |
| GNAS | Missense | p.R201C | c.601C>T |
| PIK3R1 | Missense | c.1985+1G>A | c.1985+1G>A |
| RB1 | Missense | p.G449R | c.1345G>A |
| SDHA | Nonsense | p.Q420* | c.1258C>T |
| SMAD4 | Nonsense | p.W101* | c.303G>A |
| SPEN | Frameshift deletion | p.P3317fs | c.9950delC |
| TP53 | Missense | p.C176Y | c.527G>A |
| Nonsense | p.R213* | c.637C>T |

**Table S11 Comparing Mutations of Patients (n=6) with Matched Tumour Tissue and Circulating Free DNA (ctDNA) (bold are corresponding mutations)**

| **Patient ID** | **Solid Tumour DNA Mutation** | **Circulating ctDNA Mutation** |
| --- | --- | --- |
| 19 | GNA11 | Not detected |
| SF3B1 | Not detected |
| Not detected | AXIN2 |
| **27** | **GNAQ** | **GNAQ** |
| FAT1 | Not detected |
| Not detected | CREBBP |
| Not detected | DNMT3A |
| **29** | **GNA11** | **GNA11** |
| ATM | Not detected |
| NMB | Not detected |
| Not detected | FBXW7 |
| **31** | **GNA11** | **GNA11** |
| Not detected | SMAD4 |
| ACVR1 |
| ASXL1 |
| DICER1 |
| SDHA |
| **32** | **GNA11** | **GNA11** |
| **BAP1** | **BAP1** |
| CHEK1 | Not detected |
| CYLD | Not detected |
| Not detected | PIK3R1 |
| **35** | **GNAQ** | **GNAQ** |
| **BAP1** | **BAP1** |
| FANCD2 | Not detected |
| Not detected | CDKN2A |
| Not detected | TP53 |
| GNAS |

**Table S12 List of 13 Pre-specified Genes and Assessed for Missense, Nonsense, Duplication, Frameshift, Deletion/Insertion (i.e., High or Moderate Impact on the Coding Sequence). Average Change Across these Gene Alterations was Used to Assess Variant Allele Frequency (VAFmean).**

| **Genes** |
| --- |
| BAP1 |
| BRAF |
| GNA11 |
| GNAQ |
| KIT |
| KRAS |
| NRAS |
| PIK3CA |
| PIK3C |
| PLCB4 |
| PTEN |
| SF3B1 |
| TP53 |

**Table S13** **Classes of human leukocyte antigen (HLA) in the tumour tissue (n=12) or blood (n=5) in Uveal Melanoma (UM) Patients (n=17 pts).**

| **Patient Id** | **HLA-A** | **HLA-B** | **HLA-C** |
| --- | --- | --- | --- |
| 17 | A*11:01;A*32:01 | B*08:01;B*18:01 | C*07:01;C*07:02 |
| 19 | A*30:02, A*31:01 | B*44:03, B*51:01 | C*04:01, C*05:01 |
| 32 | A*11:01, A*26:01 | B*37:01, B*15:63 | C*03:03, C*06:02 |
| 34 | A*01:01;A*33:03 | B*08:01;B*35:01 | C*04:01;C*07:01 |
| 29 | A*01:01, A*11:01 | B*35:01, B*57:01 | C*04:01, C*06:02 |
| 31 | A*01:01, A*32:01 | B*08:01, B*44:02 | C*07:01, C*05:01 |
| 13 | A*11:01, A*31:01 | B*14:01, B*27:05 | C*02:02, C*08:02 |
| 18 | A*03:02;A*32:01 | B*51:01;B*58:01 | C*07:01;C*15:02 |
| 20 | A*11:01, A*29:02 | B*35:01, B*44:03 | C*16:01, C*04:01 |
| 30 | A*03:01, A*30:01 | B*13:02, B*51:01 | C*06:02, C*14:02 |
| 24 | A*03:01;A*32:01 | B*35:01;B*50:01 | C*04:01;C*06:02 |
| 26 | **A*02:01, A*02:01** | B*13:02, B*44:02 | C*06:02, C*05:01 |
| 27 | A*01:01, A*32:01 | B*18:01, B*57:01 | C*06:02, C*07:01 |
| 28 | **A*02:01, A*32:01** | B*51:01, B*51:01 | C*01:02, C*01:02 |
| 33 | A*01:01, A*01:01 | B*08:01, B*08:01 | C*07:01, C*07:01 |
| 35 | **A*02:01, A*03:01** | B*07:02, B*44:02 | C*07:02, C*05:01 |
| 36 | A*01:01;A*32:01 | B*37:01;B*44:02 | C*06:02;C*05:01 |

Patients with HLA-A*02:01 are presented in bold
